# Supplementary material
Source: PubMed Central journal article supplement (PMC8008502)
Supplement: NIHMS1681388-supplement-Supplementary_files.pdf [file NIHMS1681388-supplement-Supplementary_files.pdf]

Supplementary Materials: The following are available online at [www.mdpi.com/xxx/s1](http://www.mdpi.com/xxx/s1),

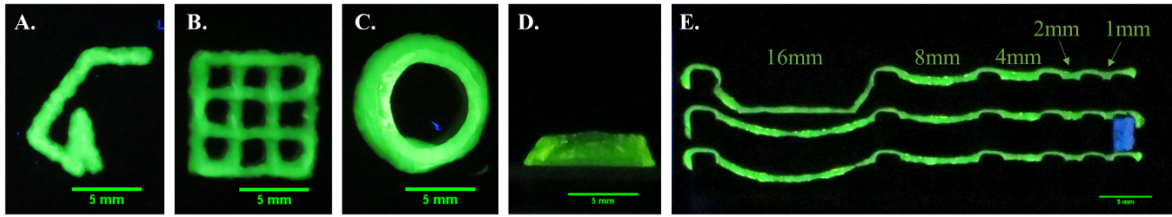

| F. | Artifact Test              | Fibrinogen  | Fibrinogen + 1% dsECM | Fibrinogen + 2% dsECM | <i>p</i> -value      |
|----|----------------------------|-------------|-----------------------|-----------------------|----------------------|
| A. | Turn Angle (125°)          | 125.4 ± 2.6 | 126.4 ± 0.5           | 129.5 ± 2.0           | <i>p</i> = 0.617     |
|    | Turn Angle (90°)           | 88.3 ± 0.2  | 87.7 ± 4.0            | 84.2 ± 3.5            | <i>p</i> = 0.617     |
|    | Turn Angle (55°)           | 59.1 ± 1.3  | 56.7 ± 2.0            | 59.7 ± 1.1            | <i>p</i> = 0.617     |
|    | Turn Angle (20°)           | 22.9 ± 2.8  | 20.2 ± 3.2            | 19.5 ± 1.8            | <i>p</i> = 0.617     |
|    | Filament Thickness         | 1.2 ± 0.1   | 1.1 ± 0.1             | 1.1 ± 0.1             | <i>p</i> = 0.152 *   |
|    | Filament Uniformity        | 1.0 ± 0.0   | 1.0 ± 0.0             | 1.0 ± 0.0             | <i>p</i> = 0.317     |
| B. | Crosshatch Pore Size       | 1.6 ± 0.3   | 2.6 ± 0.2             | 2.2 ± 0.1             | <i>p</i> = 0.002 *** |
|    | Crosshatch PR Value        | 0.94 ± 0.01 | 0.92 ± 0.01           | 0.94 ± 0.01           | <i>p</i> = 0.052 *   |
| C. | Tube Wall Thickness        | 2.2 ± 0.3   | 1.8 ± 0.2             | 2.1 ± 0.2             | <i>p</i> = 0.126 *   |
|    | Tube Radial Accuracy       | 0.9 ± 0.0   | 0.9 ± 0.0             | 0.9 ± 0.0             | <i>p</i> = 0.592     |
|    | Average Tube Height        | 2.6 ± 0.1   | 2.2 ± 0.1             | 2.4 ± 0.0             | <i>p</i> = 0.003 *** |
|    | Average Tube Width         | 9.7 ± 0.5   | 9.3 ± 0.1             | 9.1 ± 0.0             | <i>p</i> = 0.076 *   |
| E. | Deflection Overhang (16mm) | -3.0 ± 0.0  | -2.5 ± 0.4            | -2.8 ± 0.4            | <i>p</i> = 0.007 *** |
|    | Deflection Overhang (8mm)  | -0.9 ± 0.1  | -0.8 ± 0.2            | -0.9 ± 0.1            | <i>p</i> = 0.832     |
|    | Deflection Overhang (4mm)  | -0.5 ± 0.1  | -0.4 ± 0.1            | -0.4 ± 0.0            | <i>p</i> = 0.623     |
|    | Deflection Overhang (2mm)  | -0.3 ± 0.0  | -0.3 ± 0.0            | -0.2 ± 0.0            | <i>p</i> = 0.940     |
|    | Deflection Overhang (1mm)  | -0.2 ± 0.0  | -0.2 ± 0.0            | -0.1 ± 0.0            | <i>p</i> = 0.987     |

**Supplemental Figure 1: Artifact printability data.** (A) Turn accuracy, (B) crosshatch, (C) tube width, (D) tube height, and (E) overhang deflection tests were performed. (F) A table with detailed results of each printability test by hydrogel type. Data are presented as the mean ± the SD, with the associated *p*-value.

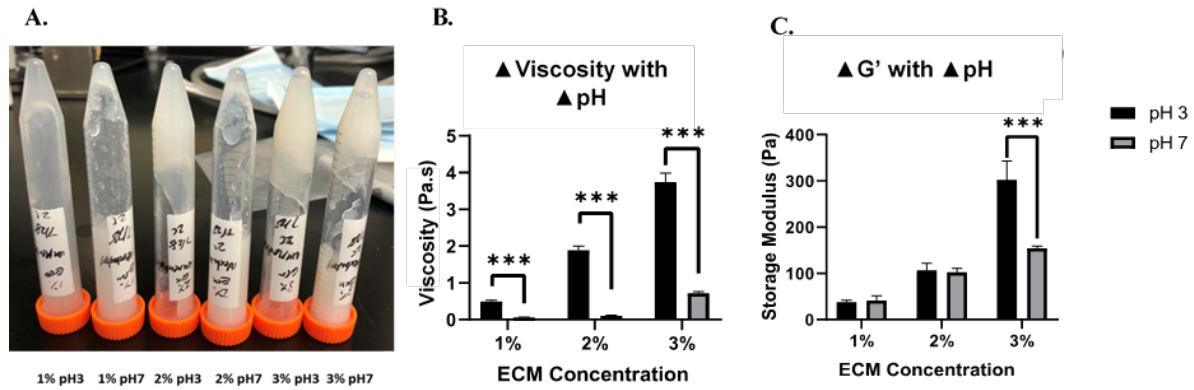

**Supplemental Figure 2: pH effect on human skin ECM rheological properties.** (A) Image of various ECM solutions at pH3 and pH7. Phase separation was observed in ECM solutions at pH7, (B) average viscosity, and (C) average  $G'$  of various ECM solutions at pH3 and pH7.
